# Supplementary material
Source: ML conference proceedings conference paper supplement (https://proceedings.neurips.cc/paper_files/paper/2019/hash/68b1fbe7f16e4ae3024973f12f3cb313-Abstract.html)
Supplement: Supplementary file [file 68b1fbe7f16e4ae3024973f12f3cb313-Supplemental.zip]

## A Supplementary Material

### A.1 Set Hyperparameters

The proposed channel gating building block introduces four hyperparameters —  $\epsilon$ ,  $\eta$ ,  $T$ , and  $\lambda$ .  $\epsilon$  is the hyperparameter in the approximated gate function.  $\eta$  is the fraction of input channels in  $\mathbf{x}_p$  of each layer.  $T$  and  $\lambda$  are the target threshold and scaling factor in the squared loss term which is used to reduce the FLOPs during training. We experimented with settings of these hyperparameters on CIFAR-10 with ResNet-18:

- $\epsilon$ : The maximum value of the partial derivative of the gate with respect to  $\mathbf{x}_p$  and  $\Delta$  equals to  $\frac{\epsilon}{4}$ . To avoid gradient vanishing and explosion, we explore three different  $\epsilon$  values ( $\epsilon = 2, 3, 4$ ).
- $\eta$ : We set a uniform  $\eta$  for all the layers and examine the impact of different  $\eta$  on the accuracy and FLOP reduction trade-off. Moreover, different layer might requires different number of channels ( $\eta c_{l-1}$ ) in the base path to minimize the accuracy loss. However, it is impractical to search for the best  $\eta$  for each layer which is a combinatorial search problem.
- $T$ : Similar to  $\eta$ , a uniform  $T$  is chosen for all the layers whereas different  $T$  values are exploited to achieve different FLOP reduction.
- $\lambda$ : The  $\lambda$  determines whether the threshold can reach the target ( $T$ ) and how many epochs needed to reach the target. If the  $\lambda$  is too large, it is equivalent to initialize the  $\Delta$  with  $T$ . In this paper, we simply set the  $\lambda$  to be relative small value ( $10^{-4}$ ) to prevent drastic changes of the  $\Delta$  value.

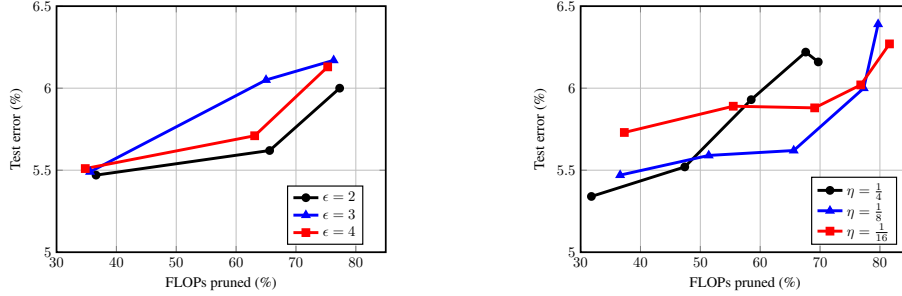

(a) Accuracy vs. FLOP reduction with different  $\epsilon$ . (b) Accuracy vs. FLOP reduction with different  $\eta$ .

Figure 7: Empirical study on choosing hyperparameters.

We first study the impact of the  $\epsilon$  on the accuracy and FLOP reduction trade-off by sweeping three target values ( $T = 0, 1, 2$ ) whereas keeping all other hyperparameters fixed ( $\eta = \frac{1}{8}$ ,  $\lambda = 10^{-4}$ ). Figure (7a) shows that the  $\epsilon = 2$  provides a better trade-off empirically. For rest of the experiments, we use  $\epsilon = 2$ . We then compare the effectiveness of having different fractions of the input channels in the base path. Three  $\eta$  values ( $\eta = \frac{1}{4}, \frac{1}{8}, \frac{1}{16}$ ) are evaluated and the results are depicted in Figure (7b). Based on the experimental results, we find that a smaller  $\eta$  provides better accuracy and FLOP reduction trade-off if targeting a lower FLOP saving.

### A.2 Datasets

The CIFAR-10 dataset consists of 50,000 training images and 10,000 test images corresponding to 10 classes. We use a standard data-augmentation scheme in [22], in which the images are zero-padded with four pixels on each side, randomly cropped to produce  $32 \times 32$  images, and horizontally mirrored. For testing, we evaluate the model using the original  $32 \times 32$  image. The ImageNet dataset contains a total of 1.2 million training images and 50,000 validation images with 1000 different classes. We follow the same data augmentation scheme adopt by [10]. The image is resized to  $256 \times 480$  pixels randomly. We scale the image by  $\frac{256}{480}$ , subtract the per-pixel mean, and random flip the image horizontally. A  $224 \times 224$  random crop is taken from an image. Moreover, the color augmentation in [18] is used. We use the  $256 \times 256$  center cropped image to test the model.

### A.3 Training Details

**CIFAR-10:** We train all models using stochastic gradient descent (SGD) with a momentum weight of 0.9 and weight decay factor of  $10^{-4}$ . For CIFAR-10, all models are trained with mini-batch size 256 for 300 epochs. The initial learning rate is 0.1 and we divide the learning rate by 10 twice at epoch 200 and 250.

**ImageNet:** All models are trained using Nesterov accelerated stochastic gradient descent (SGD) with a momentum weight of 0.9 and weight decay factor of  $10^{-4}$ . All models are trained with mini-batch size 256 for 140 epochs. The initial learning rate is 0.1 and divided by 10 at epoch 30, 60, 90, and 120.

### A.4 Ablation Study

The core idea of *CGNet* lies in channel gating, grouping, and shuffle operations. To evaluate the benefits of introducing channel grouping and shuffle, we compare the accuracy and FLOP reduction between *CGNets* with and without the grouping and shuffle operations on CIFAR-10. As shown in

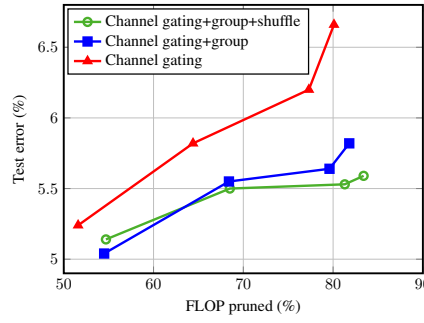

Figure 8: Accuracy vs. FLOP reduction with and without the channel grouping and shuffle operations.

Figure 8, integrating *CGNet* with channel grouping improves the test accuracy significantly. Channel grouping guarantees unbiased weight updates. The top-1 accuracy of *CGNet* with channel grouping is 0.84% higher than the one without channel grouping when the computational cost is reduced by  $5\times$ .

Moreover, as discussed in Section 3.3, channel shuffle operation enhances the cross-channel information flow when pruning the computations aggressively. *CGNet* with channel shuffle outperforms the one without channel shuffle when achieving more than  $3\times$  FLOP reduction. The top-1 accuracy of *CGNet* with channel shuffle is 0.23% higher than the one without channel shuffle when targeting at  $5\times$  FLOP reduction.

### A.5 Empirical Study of Gate Functions

| Gate Functions       | Computational Overhead                |                     | Test Error (%) | FLOP Reduction |
|----------------------|---------------------------------------|---------------------|----------------|----------------|
|                      | +                                     | $\times$            |                |                |
| $\ell^1$ -norm       | $c_{l-1} \cdot w_{l-1} \cdot h_{l-1}$ | 0                   | 8.19           | $3.97\times$   |
| FC                   | $c_{l-1} \cdot w_{l-1} \cdot h_{l-1}$ | $c_l \cdot c_{l-1}$ | 6.50           | $4.25\times$   |
| $CG_{\text{coarse}}$ | $c_l \cdot w_{l-1} \cdot h_{l-1}$     | 0                   | 6.40           | $4.15\times$   |
| $CG_{\text{fine}}$   | 0                                     | 0                   | 5.44           | $5.49\times$   |

Table 5: Comparison between different gate functions on CIFAR-10.

There exist two categories of gate functions in literature — parameter-less and parameterized gates. A parameter-less gate predicts the saliency of features based on the statistics without extra parameters whereas a parameterized gate function usually embeds a fully-connected layer to generate the saliency vectors. In contrast, our gating scheme generates activation-wise saliency at nearly zero cost by reusing a fraction of the weights and computations within a layer. It is also feasible to combine methods for generating saliency vectors proposed in previous studies [6, 8, 29] with the learnable Heaviside step function. In this subsection, we empirically compare channel gating and the two previously-proposed gating functions.

Let  $\mathbf{x}_l$  be the input features of layer  $l$  where  $\mathbf{x}_l \in \mathbb{R}^{c_{l-1} \times w_{l-1} \times h_{l-1}}$ .  $\ell^1$ -norm gate reduces  $\mathbf{x}_l$  to a saliency vector ( $\mathbf{s}_{\ell^1-\text{norm}} \in \mathbb{R}^{c_{l-1}}$ ) by calculating the  $\ell^1$ -norm of each input channel. FC gate further applies a fully-connected layer with  $c_l$  neurons on  $\mathbf{s}_{\ell^1-\text{norm}}$  to obtain the saliency vector  $\mathbf{s}_{\text{FC}} \in \mathbb{R}^{c_l}$  for output channels.  $CG_{\text{coarse}}$  and  $CG_{\text{fine}}$  represent the proposed gating scheme with different granularity of the decision.  $CG_{\text{fine}}$  generates decision for each output activation as discussed in Section 3 whereas  $CG_{\text{coarse}}$  produces a single decision for an entire output channel by aggregating the fine-grained decisions.

As shown in Table 5, the FC gate outperforms  $\ell^1$ -norm gate because it introduces the sparsity in both input and output channels, providing a quadratic reduction in computational cost with respect to the pruning ratio.  $CG_{\text{coarse}}$  achieves a similar trade-off between accuracy and FLOPs compared to the FC gate, but with lower computation overhead because it re-uses partial sums to predict the saliency of output activations. Finally, the proposed  $CG_{\text{fine}}$  provides the highest accuracy and FLOP savings with no overhead. Although it is feasible to generate activation-wise decisions using the FC gate, the computational overhead of the FC gate grows exponentially with the width/height of 2-D features as it requires having  $c_l \cdot w_l \cdot h_l$  neurons.

## A.6 Qualitative Results

|                    | dog                                                                               | frog                                                                              | deer                                                                              | cat                                                                                | airplane                                                                            |
|--------------------|-----------------------------------------------------------------------------------|-----------------------------------------------------------------------------------|-----------------------------------------------------------------------------------|------------------------------------------------------------------------------------|-------------------------------------------------------------------------------------|
| easy samples       |  |  |  |  |  |
| FLOP reduction (×) | 6.11                                                                              | 6.14                                                                              | 6.17                                                                              | 6.24                                                                               | 6.13                                                                                |
| hard samples       |  |  |  |  |  |
| FLOP reduction (×) | 4.39                                                                              | 4.43                                                                              | 4.32                                                                              | 4.47                                                                               | 4.48                                                                                |

Figure 9: Samples with different FLOP reductions for CIFAR-10.

In this subsection, we present more qualitative results of CGNet. In Figure 9, We also show the test samples with the maximum and minimum FLOP reduction for five categories in CIFAR-10. There exists more than  $2\times$  difference in FLOP reduction among these samples which demonstrates that *CGNet* can prune adaptively for different samples.
